# Supplementary material
Source: publisher figshare collection journal article supplement (https://sage.figshare.com/ndownloader/files/36928863)
Supplement: Supplementary file 1 [file 36928863]

## Appendix

See Figure A1, Table A1 to Table A3.

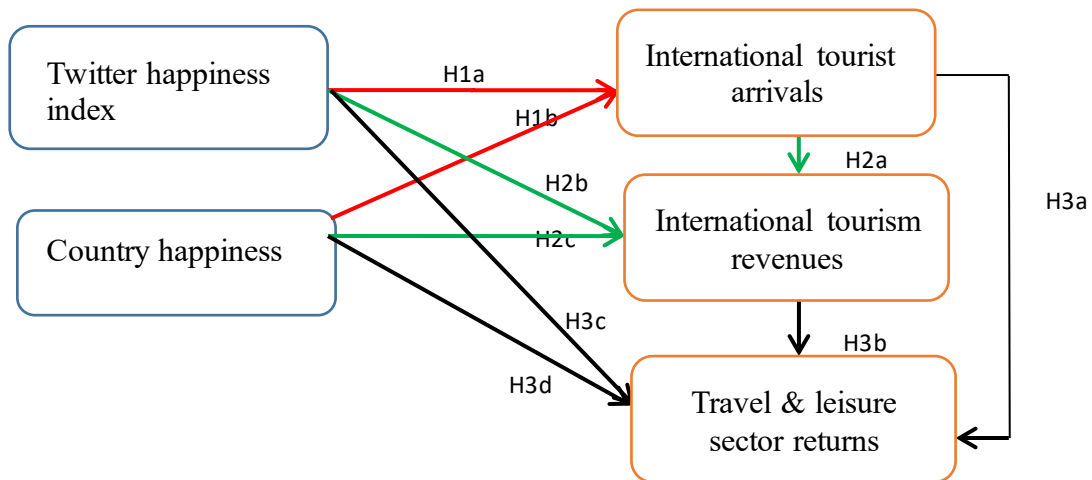

**Figure A1.** Research concept

**Table A1.** List of variables

| Variable                                                                                                                                                                  | Definition and source                                                                                                                                                                                                                                                                                                                                              |
|---------------------------------------------------------------------------------------------------------------------------------------------------------------------------|--------------------------------------------------------------------------------------------------------------------------------------------------------------------------------------------------------------------------------------------------------------------------------------------------------------------------------------------------------------------|
| <i>Dependent variables</i>                                                                                                                                                |                                                                                                                                                                                                                                                                                                                                                                    |
| ARR                                                                                                                                                                       | International inbound tourists (overnight visitors) are the yearly number of tourists who travel to a country other than that in which they have their usual residence (from World Bank database).                                                                                                                                                                 |
| REV                                                                                                                                                                       | Revenues (% of total exports) calculated as a ratio to exports of goods and services. International tourism receipts are expenditures by international inbound visitors, including payments to national carriers for international transport and any other pre-payments made for goods or services received in the destination country (from World Bank database). |
| SR                                                                                                                                                                        | Yearly travel & leisure sector returns are calculated by $(P_t - P_{t-1})/P_{t-1}$ . $P_t$ is yearly sector closing prices (from the DataStream database).                                                                                                                                                                                                         |
| <i>Independent variables</i>                                                                                                                                              |                                                                                                                                                                                                                                                                                                                                                                    |
| <i>Ten country happiness indices (yearly data from World Happiness Report, <a href="http://worldhappiness.report/ed/2019/">http://worldhappiness.report/ed/2019/</a>)</i> |                                                                                                                                                                                                                                                                                                                                                                    |
| LL                                                                                                                                                                        | Life ladder. Imagine a ladder with steps numbered from 0 at the bottom to 10 at the top. On which step of the ladder would you say you personally feel you stand at this time. The measure is referred to as the Cantril life ladder.                                                                                                                              |
| GDP                                                                                                                                                                       | Log GDP per capita of the country                                                                                                                                                                                                                                                                                                                                  |
| SS                                                                                                                                                                        | Social support in the country                                                                                                                                                                                                                                                                                                                                      |
| HLE                                                                                                                                                                       | Healthy life expectancy at birth in the country is constructed based on data from the World Health Organization (WHO) and World Development Indicators (WDI)                                                                                                                                                                                                       |
| FLC                                                                                                                                                                       | Freedom to make life choices in the country                                                                                                                                                                                                                                                                                                                        |
| GEN                                                                                                                                                                       | Generosity in the country                                                                                                                                                                                                                                                                                                                                          |
| PER                                                                                                                                                                       | Perceived absence of corruption in the country; an increase means relative improvement in governance quality                                                                                                                                                                                                                                                       |
| NEG                                                                                                                                                                       | Negative effect in the country is defined as the average of previous-day effect measures for worry, sadness, and anger for all waves                                                                                                                                                                                                                               |
| CON                                                                                                                                                                       | Confidence in the national government of the country                                                                                                                                                                                                                                                                                                               |
| DEM                                                                                                                                                                       | Democratic quality                                                                                                                                                                                                                                                                                                                                                 |
| TH                                                                                                                                                                        | Twitter happiness index (extracted daily data from Twitter and obtained from the website <a href="http://hedonometer.org/index.html">http://hedonometer.org/index.html</a> ). We use the data at the end date of the year as yearly data.                                                                                                                          |
| <i>Control variables</i>                                                                                                                                                  |                                                                                                                                                                                                                                                                                                                                                                    |
| CPI                                                                                                                                                                       | Consumer price index (2010 = 100) (from World Bank database).                                                                                                                                                                                                                                                                                                      |
| EXG                                                                                                                                                                       | Log of official exchange rate (LCU per US\$, period average) (from World Bank database).                                                                                                                                                                                                                                                                           |
| FDI                                                                                                                                                                       | Foreign direct investment, net inflows (% of GDP) (from World Bank database).                                                                                                                                                                                                                                                                                      |
| IND                                                                                                                                                                       | Log of industrial production, constant US\$ (from World Bank database).                                                                                                                                                                                                                                                                                            |
| INF                                                                                                                                                                       | Inflation, consumer prices (annual %) (from World Bank database).                                                                                                                                                                                                                                                                                                  |
| IMP                                                                                                                                                                       | Log of imported merchandise, customs, current US\$, millions, seasonally adjusted (from World Bank database).                                                                                                                                                                                                                                                      |
| OIL                                                                                                                                                                       | Crude oil price (petroleum) ( <a href="http://oilprice.com">http://oilprice.com</a> )                                                                                                                                                                                                                                                                              |
| UMP                                                                                                                                                                       | Unemployment, total (% of total labor force) (from World Bank database).                                                                                                                                                                                                                                                                                           |

**Table A2.** List of sampled countries

|                        |             |            |             |              |             |
|------------------------|-------------|------------|-------------|--------------|-------------|
| Afghanistan            | Chad        | Greece     | Latvia      | Panama       | Sweden      |
| Albania                | Chile       | Guatemala  | Lebanon     | Paraguay     | Switzerland |
| Argentina              | China       | Haiti      | Lithuania   | Peru         | Taiwan      |
| Armenia                | Colombia    | Honduras   | Madagascar  | Philippines  | Tajikistan  |
| Australia              | Congo       | Hong Kong  | Malawi      | Poland       | Tanzania    |
| Austria                | Costa Rica  | Hungary    | Malaysia    | Portugal     | Thailand    |
| Azerbaijan             | Croatia     | Iceland    | Mali        | Romania      | Turkey      |
| Bangladesh             | Cyprus      | India      | Mauritania  | Russia       | Uganda      |
| Belarus                | Czech       | Indonesia  | Mexico      | Rwanda       | Ukraine     |
| Belgium                | Denmark     | Iran       | Moldova     | Saudi Arabia | UAE         |
| Benin                  | Dominican   | Iraq       | Mongolia    | Senegal      | UK          |
| Bolivia                | Ecuador     | Ireland    | Montenegro  | Serbia       | U.S.        |
| Bosnia and Herzegovina | Egypt       | Israel     | Nepal       | Sierra Leone | Uruguay     |
| Botswana               | El Salvador | Italy      | Netherlands | Singapore    | Uzbekistan  |
| Brazil                 | Estonia     | Japan      | New Zealand | Slovakia     | Venezuela   |
| Bulgaria               | Finland     | Jordan     | Nicaragua   | Slovenia     | Vietnam     |
| Burkina Faso           | France      | Kazakhstan | Niger       | South Africa | Yemen       |
| Cambodia               | Georgia     | Kenya      | Nigeria     | South Korea  | Zambia      |
| Cameroon               | Germany     | Kuwait     | Norway      | Spain        | Zimbabwe    |
| Canada                 | Ghana       | Kyrgyzstan | Pakistan    | Sri Lanka    |             |

Notes: There are data on 156 countries in the country happiness report website. We remove those countries that do not have travel related data in the World Bank database. The above 119 countries are used in this study.

**Table A3.** Summary of the empirical results

| No. | Hypothesis                            | Result |
|-----|---------------------------------------|--------|
| H1a | TH→ARR                                | Reject |
| H1b | CH→ARR                                | Accept |
| H2a | ARR→TR                                | Accept |
| H2b | TH→TR                                 | Reject |
| H2c | CH→TR                                 | Accept |
| H3a | ARR→SR                                | Reject |
| H3b | TR→SR                                 | Reject |
| H3c | TH→SR                                 | Accept |
| H3d | CH→SR                                 | Reject |
| H4  | Happiness (non-linear impact)→Tourism | Accept |

Notes: CH (host country happiness), TH (Twitter happiness index), SR (country travel & leisure sector returns), tourism revenues (international tourism revenues as % of total exports), and ARR (log number of international inbound tourists).
